# Supplementary material for: Actin stabilizing compounds show specific biological effects due to their binding mode
Source: PubMed Central journal article supplement (PMC6611809; doi:10.1038/s41598-019-46282-w), 2019-07-05
Supplement: 41598_2019_46282_MOESM1_ESM.pdf [file 41598_2019_46282_MOESM1_ESM.pdf]

## Supplementary Information

### Actin stabilizing compounds show specific biological effects due to their binding mode

Shuaijun Wang, Alvaro H. Crevenna, Ilke Ugur, Antoine Marion, Iris Antes, Uli Kazmaier, Maria Hoyer, Don C. Lamb, Florian Gegenfurtner, Zane Kliesmete, Christoph Ziegenhain, Wolfgang Enard, Angelika Vollmar and Stefan Zahler

**Supplementary Table 1.** *List of the genes that are differently regulated in cells treated with miuraenamide A vs. jasplakinolide*

**Supplementary Table 2.** *List of the gene ontologies (GO) that are significantly regulated by MiuA treatment*

**Supplementary Table 3.** *List of significant gene set enrichment (category "biological process", Fisher's exact test:  $<0.01$ ) based on differentially regulated genes by jasp treatment compared to control*

**Supplementary Figure 1.** *Control experiments for the G-actin binding assay. (a) Gelsolin does not bind to beads that are not coupled to actin, and binding of gelsolin depends on the presence of  $Ca^{2+}$ . (b) Gelsolin competes with cofilin for binding to G-actin. (c) Miu inhibits binding of cofilin to G-actin also at a molar ratio of 1:1.*

**Supplementary Figure 2.** *Confocal images of F-actin (labelled with rhodamine-phalloidin, red) and cofilin (Alexa488, green) of untreated control cells (a) and cells treated with 50 nM MiuA for 30 min (b). After treatment with MiuA cofilin co-localizes less with F-actin as also seen in the fluorescence intensity profiles along the indicated lines of the two channels, respectively.*

## Supplementary Table 1

| ENSEMBL         | SYMBOL    | baseMean   | log2FoldChange | pvalue     | padj       |
|-----------------|-----------|------------|----------------|------------|------------|
| ENSG00000143869 | GDF7      | 12,1612956 | 3,211230417    | 0,00066079 | 0,04390488 |
| ENSG00000117707 | PROX1     | 6,9950098  | 1,200773712    | 0,00038769 | 0,02984357 |
| ENSG00000254409 | NA        | 6,75172368 | 1,031068621    | 0,00075856 | 0,04826523 |
| ENSG00000146592 | CREB5     | 4,81387076 | 0,989692802    | 0,00214647 | 0,09695071 |
| ENSG00000134070 | IRAK2     | 13,4395225 | 0,85821141     | 0,00065576 | 0,04361793 |
| ENSG00000138764 | CCNG2     | 13,0686991 | 0,847376617    | 0,00013811 | 0,01398979 |
| ENSG00000159167 | STC1      | 22,7951994 | 0,837013708    | 1,71E-05   | 0,00295321 |
| ENSG00000130522 | JUND      | 41,7888712 | 0,767387825    | 3,31E-08   | 1,97E-05   |
| ENSG00000196843 | ARID5A    | 23,5057975 | 0,762749431    | 6,30E-06   | 0,00137834 |
| ENSG00000147324 | MFHAS1    | 15,1412852 | 0,732925029    | 0,00140356 | 0,0727488  |
| ENSG00000185262 | UBALD2    | 42,8586666 | 0,64487482     | 3,38E-07   | 0,00013123 |
| ENSG00000131773 | KHDRBS3   | 23,5340208 | 0,627094638    | 0,00023705 | 0,02070649 |
| ENSG00000176907 | C8orf4    | 26,9181463 | 0,616227006    | 6,12E-05   | 0,00760694 |
| ENSG00000122861 | PLAU      | 58,8854195 | 0,594281362    | 5,34E-07   | 0,0001904  |
| ENSG00000102802 | MEDAG     | 20,0934396 | 0,590968616    | 0,00142928 | 0,07353533 |
| ENSG00000156030 | ELMSAN1   | 64,7755138 | 0,572897126    | 8,00E-06   | 0,00166579 |
| ENSG00000073756 | PTGS2     | 36,0905195 | 0,570224831    | 7,02E-05   | 0,00836912 |
| ENSG00000267519 | LOC284454 | 41,4665223 | 0,560945617    | 6,59E-05   | 0,00792582 |
| ENSG00000130513 | GDF15     | 708,008436 | 0,517880532    | 1,74E-13   | 3,36E-10   |
| ENSG00000114796 | KLHL24    | 27,0924735 | 0,509324298    | 0,00116119 | 0,06431738 |
| ENSG00000161940 | BCL6B     | 43,7222369 | 0,50318591     | 6,45E-05   | 0,00786805 |
| ENSG00000215788 | TNFRSF25  | 32,6352593 | 0,496333564    | 0,00065528 | 0,04360987 |
| ENSG00000102858 | MGRN1     | 29,1883624 | 0,471525312    | 0,0018171  | 0,08659549 |
| ENSG00000165434 | PGM2L1    | 36,2370469 | 0,451787136    | 0,00092966 | 0,05523594 |
| ENSG00000104419 | NDRG1     | 65,4743738 | 0,433732745    | 5,07E-05   | 0,00656209 |
| ENSG00000008513 | ST3GAL1   | 52,2455518 | 0,40094068     | 0,00046526 | 0,03407745 |
| ENSG00000173575 | CHD2      | 47,917017  | 0,399692546    | 0,00113307 | 0,06351039 |
| ENSG00000106144 | CASP2     | 37,0511503 | 0,383660036    | 0,00149717 | 0,07580822 |
| ENSG00000144580 | CNOT9     | 90,3178913 | 0,37166965     | 3,39E-05   | 0,00489103 |
| ENSG00000164938 | TP53INP1  | 63,920527  | 0,370973762    | 0,00037737 | 0,0291967  |
| ENSG00000171056 | SOX7      | 54,8476519 | 0,360656701    | 0,00072401 | 0,04700333 |
| ENSG00000137834 | SMAD6     | 121,948355 | 0,3585581      | 0,0002086  | 0,01893161 |
| ENSG00000130340 | SNX9      | 66,2626525 | 0,355227145    | 0,00050724 | 0,03650922 |
| ENSG00000138434 | SSFA2     | 54,9343108 | 0,344254459    | 0,00101624 | 0,05874504 |
| ENSG00000107438 | PDLIM1    | 107,23865  | 0,332260672    | 0,00053902 | 0,03816533 |
| ENSG00000197632 | SERPINB2  | 78,299862  | 0,326985741    | 0,00160777 | 0,07936332 |
| ENSG00000136802 | LRR8A     | 235,319363 | 0,325326803    | 1,92E-08   | 1,23E-05   |
| ENSG00000183578 | TNFAIP8L3 | 90,7877088 | 0,315874037    | 0,00036511 | 0,02855605 |
| ENSG00000228470 | NA        | 89,6018438 | 0,312031431    | 0,00029326 | 0,02442774 |
| ENSG00000158769 | F11R      | 82,0601165 | 0,302235223    | 0,00139272 | 0,07246435 |
| ENSG00000151012 | SLC7A11   | 82,7056378 | 0,301238012    | 0,00127783 | 0,06819069 |
| ENSG00000087074 | PPP1R15A  | 106,256495 | 0,27161909     | 0,00072546 | 0,04702655 |
| ENSG00000213707 | NA        | 140,893306 | 0,268136758    | 0,00222089 | 0,0992403  |
| ENSG00000011422 | PLAUR     | 148,981947 | 0,25625363     | 0,0005689  | 0,03952355 |
| ENSG00000157191 | NECAP2    | 119,240373 | 0,237760585    | 0,00166523 | 0,08146062 |
| ENSG00000162407 | PLPP3     | 172,539066 | 0,233707345    | 0,00183159 | 0,08711557 |
| ENSG00000134294 | SLC38A2   | 357,910122 | 0,232223562    | 0,00010455 | 0,01136282 |
| ENSG00000124762 | CDKN1A    | 319,443467 | 0,228764937    | 2,38E-05   | 0,00375222 |
| ENSG00000229344 | NA        | 5665,93474 | 0,211642945    | 9,01E-05   | 0,0100968  |

|                 |             |            |              |            |            |
|-----------------|-------------|------------|--------------|------------|------------|
| ENSG00000067082 | KLF6        | 237,579626 | 0,193719487  | 0,00115517 | 0,06422145 |
| ENSG00000124766 | SOX4        | 1254,7448  | 0,18198231   | 0,00222527 | 0,09932691 |
| ENSG00000131711 | MAP1B       | 576,803941 | 0,176298073  | 3,93E-05   | 0,00547202 |
| ENSG00000142192 | APP         | 351,095286 | 0,162731651  | 0,00198436 | 0,0917555  |
| ENSG00000198786 | ND5         | 838,781205 | 0,150652582  | 0,00074444 | 0,04771955 |
| ENSG00000125810 | CD93        | 386,776359 | 0,146201722  | 0,00204198 | 0,0933214  |
| ENSG00000151131 | C12orf45    | 268,382041 | -0,21024775  | 0,00214708 | 0,09695071 |
| ENSG00000138385 | SSB         | 185,094093 | -0,214006338 | 0,00142173 | 0,07334747 |
| ENSG00000149357 | LAMTOR1     | 139,431261 | -0,239179547 | 0,00079173 | 0,04957737 |
| ENSG00000133226 | SRRM1       | 375,102906 | -0,272147429 | 0,00051291 | 0,0367654  |
| ENSG00000115875 | SRSF7       | 119,235007 | -0,297525344 | 0,00020567 | 0,01881552 |
| ENSG00000139168 | ZCRB1       | 131,131784 | -0,304510218 | 0,0014063  | 0,07282885 |
| ENSG00000133773 | CCDC59      | 85,2291742 | -0,307601768 | 0,00201229 | 0,09246211 |
| ENSG00000238072 | NA          | 69,5976404 | -0,307819146 | 0,00215496 | 0,09707743 |
| ENSG00000048162 | NOP16       | 134,341148 | -0,313659024 | 2,15E-05   | 0,00348392 |
| ENSG00000240298 | NA          | 62,3763571 | -0,319876639 | 0,00191628 | 0,08974243 |
| ENSG00000179131 | NA          | 77,2328996 | -0,331069114 | 0,00216514 | 0,09750007 |
| ENSG00000164741 | DLC1        | 51,9483834 | -0,345891822 | 0,00185087 | 0,08762236 |
| ENSG00000142871 | CYR61       | 235,361041 | -0,370878102 | 0,00016354 | 0,01591759 |
| ENSG00000266086 | NA          | 71,1093436 | -0,392386662 | 5,06E-05   | 0,00655592 |
| ENSG00000155850 | SLC26A2     | 45,6745027 | -0,444084894 | 0,000238   | 0,02074545 |
| ENSG00000179144 | GIMAP7      | 73,1894221 | -0,469074649 | 4,46E-05   | 0,00597939 |
| ENSG00000080608 | PUM3        | 104,021307 | -0,474190625 | 1,08E-05   | 0,0020823  |
| ENSG00000099260 | PALMD       | 77,5489432 | -0,483968208 | 9,46E-06   | 0,00187135 |
| ENSG00000237049 | NA          | 30,5010276 | -0,493060911 | 0,00108841 | 0,06171657 |
| ENSG00000137463 | MGARP       | 24,9273743 | -0,521143856 | 0,00154892 | 0,077368   |
| ENSG00000196873 | CBWD3       | 26,5944043 | -0,552697818 | 0,00045917 | 0,03376768 |
| ENSG00000117152 | RGS4        | 33,6028624 | -0,589116209 | 0,00013311 | 0,01361863 |
| ENSG00000120738 | EGR1        | 15,7402692 | -0,629288447 | 0,0019559  | 0,09096887 |
| ENSG00000099860 | GADD45B     | 22,2964557 | -0,635534712 | 0,00030033 | 0,02486209 |
| ENSG00000107984 | DKK1        | 99,9401769 | -0,650902736 | 6,50E-05   | 0,0078897  |
| ENSG00000078401 | EDN1        | 260,830597 | -0,680275946 | 7,62E-09   | 5,73E-06   |
| ENSG00000244756 | NA          | 23,7608697 | -0,767663412 | 1,30E-05   | 0,00241149 |
| ENSG00000157168 | NRG1        | 20,6776412 | -0,778532334 | 2,79E-05   | 0,00420651 |
| ENSG00000180104 | EXOC3       | 15,8029714 | -0,797772381 | 0,00011715 | 0,01231661 |
| ENSG00000125378 | BMP4        | 24,0942604 | -0,826740033 | 6,51E-05   | 0,0078897  |
| ENSG00000124523 | SIRT5       | 8,94292235 | -0,852466902 | 0,0010919  | 0,06182819 |
| ENSG00000118523 | CTGF        | 679,769853 | -0,85885136  | 1,07E-14   | 2,38E-11   |
| ENSG00000148677 | ANKRD1      | 3885,6597  | -0,889321614 | 9,17E-13   | 1,55E-09   |
| ENSG00000178882 | RFLNA       | 23,2346925 | -1,022347951 | 3,40E-07   | 0,00013141 |
| ENSG00000243537 | NA          | 4,24821161 | -1,286558947 | 0,00148006 | 0,07533573 |
| ENSG00000128383 | APOBEC3A    | 3,57717737 | -1,405510384 | 0,00144089 | 0,07392863 |
| ENSG00000171016 | PYGO1       | 3,26208156 | -1,439309644 | 0,00132005 | 0,06963448 |
| ENSG00000218472 | NA          | 5,56373608 | -1,588729529 | 0,00032532 | 0,02634036 |
| ENSG00000275757 | LOC10000858 | 10,1139674 | -1,765498882 | 2,05E-05   | 0,00338016 |
| ENSG00000235332 | NA          | 2,51970313 | -1,860462883 | 0,00089551 | 0,05386374 |
| ENSG00000109846 | CRYAB       | 5,56763057 | -2,016951635 | 5,58E-06   | 0,0012453  |
| ENSG00000166165 | CKB         | 9,31435082 | -2,276836856 | 3,17E-05   | 0,00467047 |
| ENSG00000250397 | NA          | 1,89401328 | -2,543100155 | 0,00187365 | 0,08825596 |
| ENSG00000231034 | NA          | 2,01281478 | -2,603037911 | 0,00179789 | 0,08591501 |

|                 |    |            |              |            |            |
|-----------------|----|------------|--------------|------------|------------|
| ENSG00000234576 | NA | 7,74783861 | -3,140189044 | 0,00080679 | 0,05013368 |
| ENSG00000278806 | NA | 10,140733  | -4,458140103 | 1,89E-05   | 0,00316203 |

## Supplementary Table 2

| GO,ID      | Term                                                                 | Annotated | Significant | Expected | Fisher  |
|------------|----------------------------------------------------------------------|-----------|-------------|----------|---------|
| GO:0071260 | cellular response to mechanical stimulus                             | 56        | 11          | 2,87     | 0,00011 |
| GO:0045987 | positive regulation of smooth muscle contraction                     | 11        | 5           | 0,56     | 0,00012 |
| GO:0042273 | ribosomal large subunit biogenesis                                   | 57        | 11          | 2,92     | 0,00012 |
| GO:0045214 | sarcomere organization                                               | 18        | 6           | 0,92     | 0,00019 |
| GO:0030335 | positive regulation of cell migration                                | 265       | 31          | 13,59    | 0,0002  |
| GO:0038096 | Fc-gamma receptor signaling pathway involved in phagocytosis         | 62        | 11          | 3,18     | 0,00027 |
| GO:0010592 | positive regulation of lamellipodium assembly                        | 13        | 5           | 0,67     | 0,00032 |
| GO:0007015 | actin filament organization                                          | 253       | 39          | 12,97    | 0,00036 |
| GO:0045601 | regulation of endothelial cell differentiation                       | 20        | 6           | 1,03     | 0,00037 |
| GO:0090151 | establishment of protein localization to mitochondrial membrane      | 14        | 5           | 0,72     | 0,00047 |
| GO:2001222 | regulation of neuron migration                                       | 21        | 6           | 1,08     | 0,00049 |
| GO:0030220 | platelet formation                                                   | 15        | 5           | 0,77     | 0,00068 |
| GO:0030901 | midbrain development                                                 | 59        | 10          | 3,03     | 0,00075 |
| GO:0002064 | epithelial cell development                                          | 124       | 19          | 6,36     | 0,00081 |
| GO:0032970 | regulation of actin filament-based process                           | 231       | 34          | 11,84    | 0,00092 |
| GO:0007254 | JNK cascade                                                          | 130       | 16          | 6,67     | 0,00097 |
| GO:0060996 | dendritic spine development                                          | 61        | 10          | 3,13     | 0,00098 |
| GO:0070423 | nucleotide-binding oligomerization domain containing signaling pathw | 32        | 7           | 1,64     | 0,00098 |
| GO:0071347 | cellular response to interleukin-1                                   | 51        | 9           | 2,61     | 0,00101 |
| GO:0008361 | regulation of cell size                                              | 107       | 14          | 5,49     | 0,00109 |
| GO:0048146 | positive regulation of fibroblast proliferation                      | 33        | 7           | 1,69     | 0,00119 |
| GO:0001503 | ossification                                                         | 240       | 24          | 12,31    | 0,00131 |
| GO:0060333 | interferon-gamma-mediated signaling pathway                          | 53        | 9           | 2,72     | 0,00134 |
| GO:0071417 | cellular response to organonitrogen compound                         | 341       | 31          | 17,48    | 0,00136 |
| GO:0006954 | inflammatory response                                                | 312       | 29          | 16       | 0,00137 |
| GO:0034332 | adherens junction organization                                       | 98        | 13          | 5,02     | 0,00143 |
| GO:0007163 | establishment or maintenance of cell polarity                        | 123       | 15          | 6,31     | 0,00152 |
| GO:0002181 | cytoplasmic translation                                              | 44        | 8           | 2,26     | 0,00156 |
| GO:0006937 | regulation of muscle contraction                                     | 66        | 14          | 3,38     | 0,00166 |
| GO:1900026 | positive regulation of substrate adhesion-dependent cell spreading   | 26        | 6           | 1,33     | 0,00169 |
| GO:0016601 | Rac protein signal transduction                                      | 26        | 6           | 1,33     | 0,00169 |
| GO:0007588 | excretion                                                            | 18        | 5           | 0,92     | 0,00171 |

|            |                                                                |     |    |       |         |
|------------|----------------------------------------------------------------|-----|----|-------|---------|
| GO:1902905 | positive regulation of supramolecular fiber organization       | 120 | 18 | 6,15  | 0,00174 |
| GO:0022618 | ribonucleoprotein complex assembly                             | 177 | 19 | 9,08  | 0,0018  |
| GO:2000146 | negative regulation of cell motility                           | 154 | 18 | 7,9   | 0,00229 |
| GO:0017148 | negative regulation of translation                             | 129 | 15 | 6,61  | 0,00245 |
| GO:0002262 | myeloid cell homeostasis                                       | 104 | 13 | 5,33  | 0,00246 |
| GO:0051092 | positive regulation of NF-kappaB transcription factor activity | 93  | 12 | 4,77  | 0,00273 |
| GO:0030260 | entry into host cell                                           | 93  | 12 | 4,77  | 0,00273 |
| GO:0035094 | response to nicotine                                           | 20  | 5  | 1,03  | 0,00284 |
| GO:0043123 | positive regulation of I-kappaB kinase/NF-kappaB signaling     | 133 | 15 | 6,82  | 0,0033  |
| GO:0071356 | cellular response to tumor necrosis factor                     | 187 | 19 | 9,59  | 0,00337 |
| GO:0043542 | endothelial cell migration                                     | 122 | 14 | 6,26  | 0,0038  |
| GO:0051216 | cartilage development                                          | 110 | 13 | 5,64  | 0,00404 |
| GO:0030216 | keratinocyte differentiation                                   | 62  | 9  | 3,18  | 0,00409 |
| GO:0007179 | transforming growth factor beta receptor signaling pathway     | 123 | 14 | 6,31  | 0,00409 |
| GO:0000187 | activation of MAPK activity                                    | 86  | 11 | 4,41  | 0,00432 |
| GO:0034314 | Arp2/3 complex-mediated actin nucleation                       | 31  | 6  | 1,59  | 0,00434 |
| GO:0061028 | establishment of endothelial barrier                           | 31  | 6  | 1,59  | 0,00434 |
| GO:0048333 | mesodermal cell differentiation                                | 22  | 5  | 1,13  | 0,00442 |
| GO:0010470 | regulation of gastrulation                                     | 22  | 5  | 1,13  | 0,00442 |
| GO:0003206 | cardiac chamber morphogenesis                                  | 75  | 10 | 3,85  | 0,00474 |
| GO:0045446 | endothelial cell differentiation                               | 74  | 15 | 3,79  | 0,00479 |
| GO:0030048 | actin filament-based movement                                  | 67  | 12 | 3,44  | 0,00503 |
| GO:0002009 | morphogenesis of an epithelium                                 | 341 | 29 | 17,48 | 0,00505 |
| GO:1901185 | negative regulation of ERBB signaling pathway                  | 42  | 7  | 2,15  | 0,00505 |
| GO:0008064 | regulation of actin polymerization or depolymerization         | 123 | 20 | 6,31  | 0,00516 |
| GO:0097421 | liver regeneration                                             | 23  | 5  | 1,18  | 0,00542 |
| GO:0030198 | extracellular matrix organization                              | 182 | 18 | 9,33  | 0,00565 |
| GO:0001525 | angiogenesis                                                   | 269 | 28 | 13,79 | 0,00613 |
| GO:0061842 | microtubule organizing center localization                     | 24  | 5  | 1,23  | 0,00656 |
| GO:0030195 | negative regulation of blood coagulation                       | 24  | 5  | 1,23  | 0,00656 |

## Supplementary Table 3

| GO,ID      | Term                                               | Annotated | Significant | Expected | Fisher  |
|------------|----------------------------------------------------|-----------|-------------|----------|---------|
| GO:0030335 | positive regulation of cell migration              | 265       | 14          | 4,39     | 0,00013 |
| GO:0007015 | actin filament organization                        | 253       | 22          | 4,19     | 0,00014 |
| GO:0034314 | Arp2/3 complex-mediated actin nucleation           | 31        | 5           | 0,51     | 0,00014 |
| GO:0007163 | establishment or maintenance of cell polarity      | 123       | 9           | 2,04     | 0,0002  |
| GO:0002576 | platelet degranulation                             | 80        | 7           | 1,33     | 0,00035 |
| GO:0007229 | integrin-mediated signaling pathway                | 61        | 6           | 1,01     | 0,00049 |
| GO:0071346 | cellular response to interferon-gamma              | 71        | 6           | 1,18     | 0,00111 |
| GO:0003206 | cardiac chamber morphogenesis                      | 75        | 8           | 1,24     | 0,00116 |
| GO:0006937 | regulation of muscle contraction                   | 66        | 8           | 1,09     | 0,00194 |
| GO:0032956 | regulation of actin cytoskeleton organization      | 210       | 17          | 3,48     | 0,00198 |
| GO:0003014 | renal system process                               | 55        | 5           | 0,91     | 0,00209 |
| GO:2000379 | positive regulation of reactive oxygen species me  | 55        | 5           | 0,91     | 0,00209 |
| GO:0045165 | cell fate commitment                               | 110       | 7           | 1,82     | 0,0023  |
| GO:0048145 | regulation of fibroblast proliferation             | 57        | 5           | 0,94     | 0,00246 |
| GO:0019221 | cytokine-mediated signaling pathway                | 320       | 13          | 5,3      | 0,00253 |
| GO:0000910 | cytokinesis                                        | 113       | 7           | 1,87     | 0,00268 |
| GO:0030509 | BMP signaling pathway                              | 90        | 6           | 1,49     | 0,00374 |
| GO:0032970 | regulation of actin filament-based process         | 231       | 20          | 3,83     | 0,00375 |
| GO:0051092 | positive regulation of NF-kappaB transcription fac | 93        | 6           | 1,54     | 0,00439 |
| GO:0009612 | response to mechanical stimulus                    | 124       | 7           | 2,05     | 0,00449 |
| GO:0002064 | epithelial cell development                        | 124       | 7           | 2,05     | 0,00449 |
| GO:0048812 | neuron projection morphogenesis                    | 344       | 13          | 5,7      | 0,00468 |
| GO:0032535 | regulation of cellular component size              | 236       | 17          | 3,91     | 0,00547 |
| GO:0051017 | actin filament bundle assembly                     | 98        | 6           | 1,62     | 0,00567 |
| GO:0045860 | positive regulation of protein kinase activity     | 312       | 12          | 5,17     | 0,00568 |
| GO:0043588 | skin development                                   | 130       | 7           | 2,15     | 0,00581 |
| GO:0034333 | adherens junction assembly                         | 71        | 5           | 1,18     | 0,00634 |
| GO:0002009 | morphogenesis of an epithelium                     | 341       | 17          | 5,65     | 0,00637 |
| GO:0006936 | muscle contraction                                 | 153       | 15          | 2,53     | 0,00639 |
| GO:0030307 | positive regulation of cell growth                 | 103       | 6           | 1,71     | 0,0072  |
| GO:0001525 | angiogenesis                                       | 269       | 13          | 4,46     | 0,00737 |
| GO:0071560 | cellular response to transforming growth factor b  | 155       | 10          | 2,57     | 0,00753 |

|            |                                                |     |    |      |         |
|------------|------------------------------------------------|-----|----|------|---------|
| GO:0045446 | endothelial cell differentiation               | 74  | 5  | 1,23 | 0,00755 |
| GO:0071158 | positive regulation of cell cycle arrest       | 74  | 5  | 1,23 | 0,00755 |
| GO:0007160 | cell-matrix adhesion                           | 139 | 7  | 2,3  | 0,00829 |
| GO:0008360 | regulation of cell shape                       | 108 | 6  | 1,79 | 0,00901 |
| GO:0001933 | negative regulation of protein phosphorylation | 292 | 11 | 4,84 | 0,00925 |
| GO:0003231 | cardiac ventricle development                  | 78  | 7  | 1,29 | 0,00926 |
| GO:0008217 | regulation of blood pressure                   | 78  | 5  | 1,29 | 0,00938 |



**a**

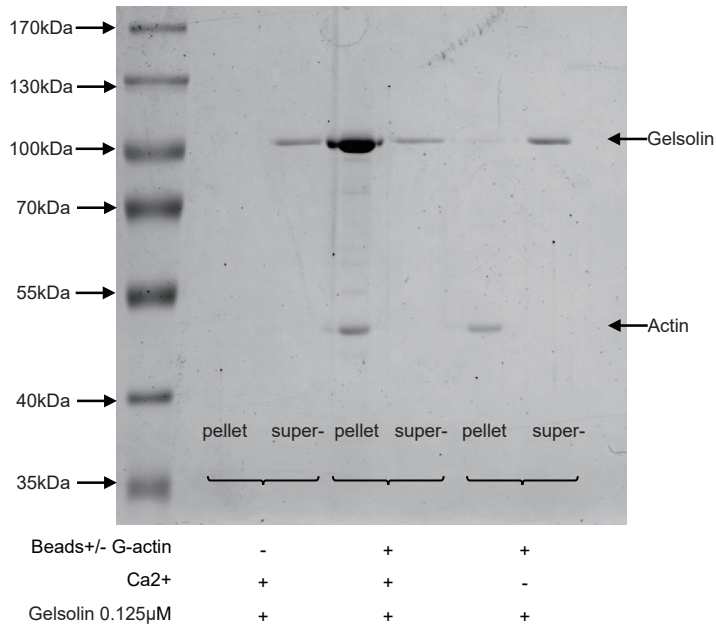

**b**

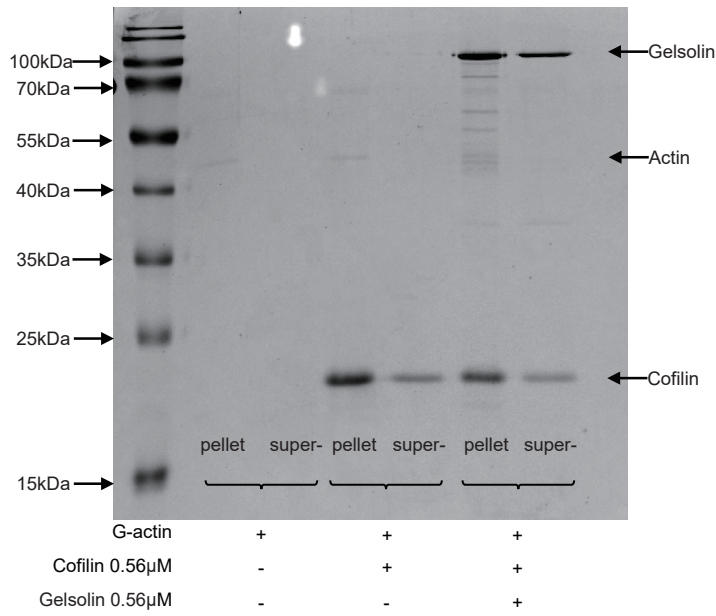

**c**

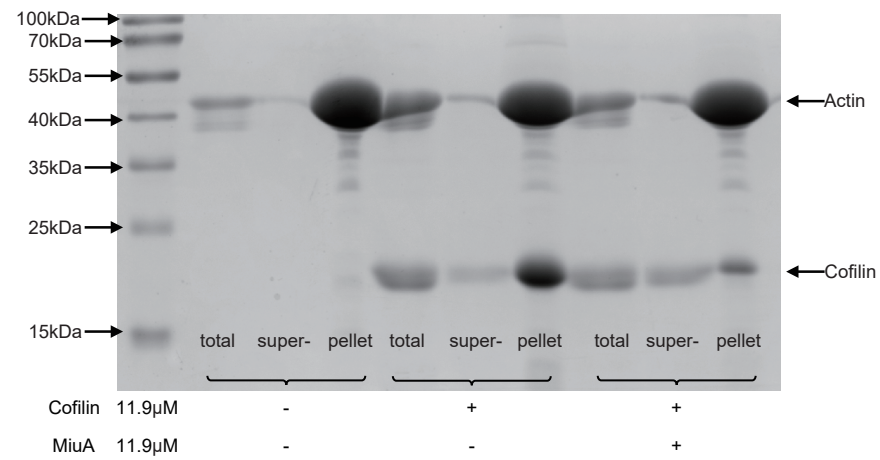

Supplementary Figure 1

a

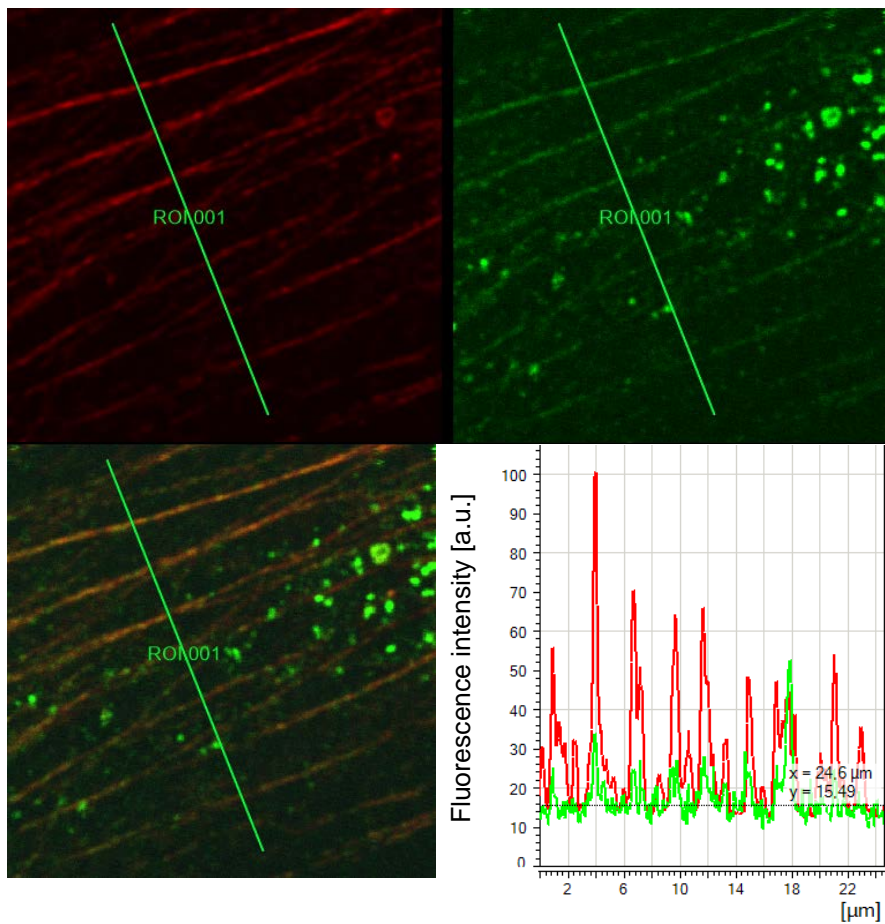

b

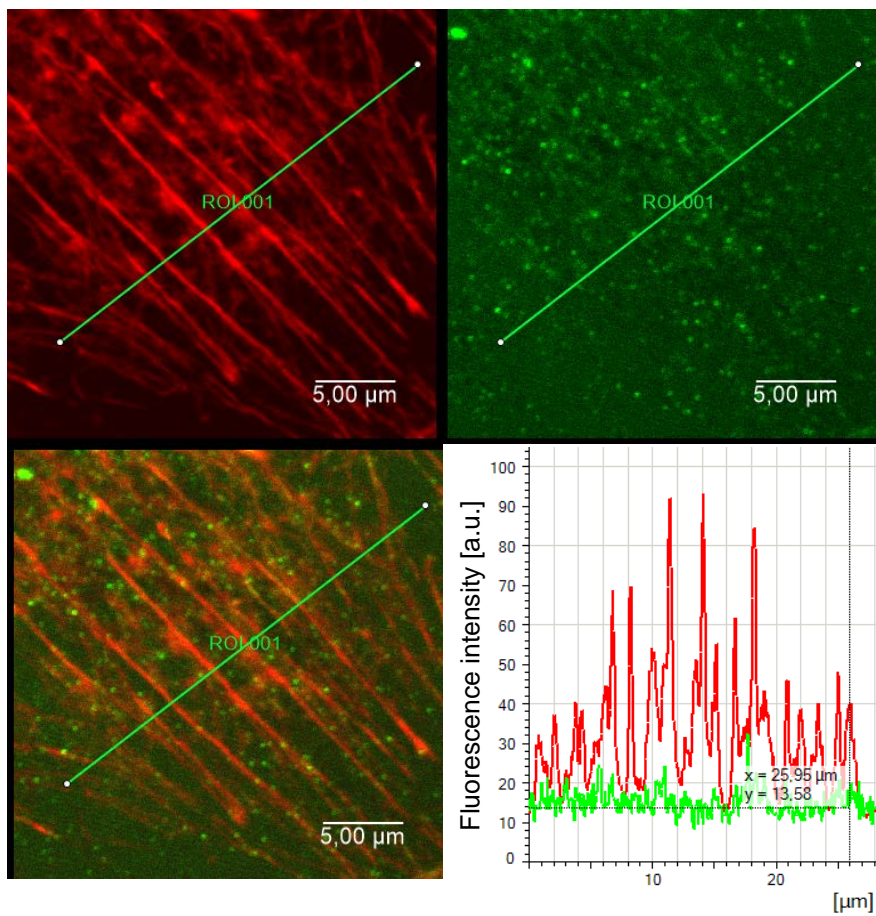

Supplementary Figure 2
